# Supplementary material for: Combination of Ribociclib with BET-Bromodomain and PI3K/mTOR Inhibitors for Medulloblastoma Treatment In Vitro and In Vivo
Source: Oxford University Press journal article supplement (doi:10.1158/1535-7163.mct-21-0896), 2022-11-01
Supplement: mct-21-0896_supplementary_table_s2_suppst2.xlsx [file mct-21-0896_supplementary_table_s2_suppst2.xlsx]

## Sheet: Compounds list
Compound name	Class/Target	Source	Cat#	Lot#	CAS	Included in single agent screen?	Included in ribociclib combination screen?	Included in JQ1 combination screen?
ABT-737	Bcl-xL, Bcl-2 and Bcl-w inhibitor	SELLECK	S1002	S100202	852808-04-9	no	no	yes
IRINOTECAN	DNA topoisomerase I inhibitor	BIOTANG	RS030	62711	100286-90-6	no	no	yes
MILCICLIB	CDK2 inhibitor (dual inhibitor of CDKs and TRKs)	SELLECK	S27751	S275101	802539-81-7	no	no	yes
MK-0752	Notch inhibitor; γ-secretase inhibitor	SELLECK	S2660	S266001	471905-41-6	no	no	yes
RO-4929097	Notch inhibitor	SELLECK	S1575	S157502	847925-91-1	no	no	yes
AMG 900	Aurora A and B inhibitors	APEXBIO	A4119	1	945595-80-2	yes	yes	no
ARRY-520 (FILANESIB)	kinesin spindle protein inhibitor	MCE	HY-15187	7464	885060-09-3	yes	yes	no
BI-2536	PLK1 inhibitor	ADOOQ	A10134	L10134B004	755038-02-9	yes	yes	no
BORTEZOMIB	proteasome inhibitor	LC_LABS	B-1408	BBZ-105	179324-69-7	yes	yes	no
BOSUTINIB	Abl/Src	LC Labs	B-1788	BSB-102	380843-75-4	yes	yes	no
CABOZANTINIB	VEGFR, RET, cMET	ASTATECH	41133	P105-00693	849217-68-1	yes	yes	no
CFI-400945	PLK4 inhibitor	ACTIVE_BIOCHEM	A-6005	NA	1338806-73-7	yes	yes	no
CH5424802 (ALECTINIB)	ALK, RET	Medkoo	205799	BBC50128	1256580-46-7	yes	yes	no
CMP5	PRMT5 inhibitor	EMD	534356	NA	NA	yes	yes	no
CYC-065	CDK2/9 inhibitor	MCE	HY-101212	26297	1070790-89-4	yes	yes	no
DASATINIB	Abl/Src	LC Labs	D-3307	BDS-105	302962-49-8	yes	yes	no
EPZ-6438	EZH2 inhibitor	Medkoo	406265	CRB60711	1403254-99-8	yes	yes	no
EPZ011989	EZH2 inhibitor	MEDKOO	407134	CRB51019	1598383-40-4	yes	yes	no
GNE-7915	LRRK2 inhibitor (brain penetrant)	CHEMIETEK	CT-GNE79	1	1351761-44-8	yes	yes	no
GSK-3326595 (EPZ-015938)	PRMT5 inhibitor	CHEMIETEK	CT-GSK332	1	1616392-22-3	yes	yes	no
IPI-926 (SARIDEGIB)	Smo inhibitor	ACTIVE_BIOCHEM	A-1062	1	1037210-93-7	yes	yes	no
ITRACONAZOLE	antifungal SMO inhibitor	TCI_AMERICA	I0732	MBW8F-0P	84625-61-6	yes	yes	no
LY2157299 (GALENISERTIB)	TGF beta inhibitor	ENOVATION_CHEM	D572882	2017082401	700874-72-2	yes	yes	no
MI-2-2	Menin inhibitor	EMD	444825	2627003	NA	yes	yes	no
NILOTINIB	Bcr-Abl	LC_LABS	N-8207	BNL-105	641571-10-0	yes	yes	no
OTX015	BET inhibitor	MEDKOO	206116	TZC50528	202590-98-5	yes	yes	no
PALOMID 529	mTORC1/2	SELLECK	S2238	S223801	914913-88-5	yes	yes	no
PD-0325901	MEK inhibitor (brain penetrant)	MCE	HY-10254	12267	391210-10-9	yes	yes	no
PF-03758309	PAK4 inhibitor	CHEMIETEK	CT-PF0375	3	1279034-84-2	yes	yes	no
PI3K-IN-2 (PQR309)	pan-PI3K/ mTORC1/2	MEDKOO	206146	B8B01C05	1225037-39-7	yes	yes	no
PTC-209	Bmi1Inhibitor	ADOOQ	A13826	L13826B001	315704-66-6	yes	yes	no
QC6352	KDM4C inhibitor	SJ_BYOUNG (synthesized in-house)	BMYN-29-1	NA	NA	yes	yes	no
SARACATINIB FREE BASE (AZD-0530)	Src, Abl	SELLECK	S1006	S100601	379231-04-6	yes	yes	no
SN-38	DNA topoisomerase I inhibitor	TCI_AMERICA	E0748	F4TKH-SS	86639-52-3	yes	yes	no
TAK-960	PLK1-3	ADOOQ	A11146	L11146B003	1137868-52-0	yes	yes	no
TBB	CK2 inhibitor : tool compound	CAYMAN	14453	0479651-2	17374-26-4	yes	yes	no
VENETOCLAX (ABT-199)	Bcl2/Bax-Bak inhibitor	CHEMIETEK	CT-A199	1	1257044-40-8	yes	yes	no
VOLASERTIB (BI 6727)	PLK1 inhibitor	MCE	HY-12137	12094	755038-65-4	yes	yes	no
4-HP-CYP	Alkylating agent	Toronto	H714675	NA	39800-16-3	yes	yes	yes
ABEMACICLIB	CDK4/6 inhibitor	MEDKOO	205911	SSC20130729	1231929-97-7	yes	yes	yes
ALISERTIB	Aurora A and B kinase inhibitor	Medkoo	201931	B7B09C28	1028486-01-2	yes	yes	yes
BARASERTIB	Aurora B kinase inhibitor	MCE	HY-10127	13477	722543-31-9	yes	yes	yes
BIIB021	HSP90 inhibitor	SELLECK	S1175	S117501	848695-25-0	yes	yes	yes
BRIVANIB	PDGFR/VEGFR	SELLECK	S1084	NA	NA	yes	yes	yes
BUPARLISIB	PI3K inhibitor	CHEMIETEK	CT-BKM120	1	944396-07-0	yes	yes	yes
CABAZITAXEL	Microtubule inhibitor	CARBOSYNTH	FC19621	FC196211501	183133-96-2	yes	yes	yes
CPI-0610	BET inhibitor	4C_PHARMA_SCI	4CH-030572	NA	1380087-89-7	yes	yes	yes
CX-9545	CK2 inhibitor	Medkoo	200843	SSC500506	1009820-21-6	yes	yes	yes
DACTOLISIB	PI3Ki/mTOR inhibitor	LC_LABS	N-4288_50MG	NVP-113	915019-65-7	yes	yes	yes
DOXORUBICIN	DNA topoisomerase II inhibitor	BIOTANG	RYG02	NA	NA	yes	yes	yes
ETOPOSIDE	DNA topoisomerase II inhibitor	MP_BIOMEDICALS	193918	2951KA	33419-42-0	yes	yes	yes
GDC-0084	PI3Ki/mTOR inhibitor	MEDKOO	206559	BBC70328	1382979-44-3	yes	yes	yes
GEMCITABINE	DNA/RNA synthesis inhibitor	LC_LABS	G-4177	GMC-104	122111-03-9	yes	yes	yes
IC 261	CK1 Casein kinase 1ε and 1δ inhibitor	Medkoo	407225	XPR70221	186611-52-9	yes	yes	yes
ICG001	beta-catenin pathway inhibitor	MCE	HY-14428	4362	847591-62-2	yes	yes	yes
INK-128	mTOR inhibitor	ACTIVE_BIOCHEM	A1023	2	1224844-38-5	yes	yes	yes
JQ1	BET inhibitor	ENOVATION_CHEM	D372464	2017040901	1268524-70-4	yes	yes	yes
LORLATINIB (PF06463922)	ALK inhibitor	Medkoo	406533	TZC60314	1454846-35-5	yes	yes	yes
LY2857785	CDK9 inhibitor	ADOOQ	A15823	L15823B001	1619903-54-6	yes	yes	yes
MOCETINOSTAT	HDAC inhibitor (isoform selective)	LC_LABS	M-2433	MCT-101	726169-73-9	yes	yes	yes
NAVITOCLAX	Bcl-xL, Bcl-2 and Bcl-w inhibitor	MCE	HY-10087	5006	923564-51-6	yes	yes	yes
NIFURTIMOX	Anti-parasitic (nitrofuran compound)	SIGMA	N3415	105M4749V	23256-30-6	yes	yes	yes
OXALIPLATIN	Alkylating-like agent	3B_SCIENTIFIC	3B2-0244	NA	NA	yes	yes	yes
PALBOCICLIB	CDK4/6 inhibitor	LC_LABS	P-7788	PLH-103	827022-32-2	yes	yes	yes
PANOBINOSTAT	HDAC inhibitor	TSZ_CHEM	RP05	61012	404950-80-7	yes	yes	yes
PEMETREXED	Folate pathway inhibitor	LC_LABS	P-7177	PEM-101	357166-29-1	yes	yes	yes
PIMASERTIB	MEK inhibitor	APEXBIO	A5573	1	1236699-92-5	yes	yes	yes
PREXASERTIB	Chk1/2 inhibitor	ADOOQ	A13684	L13684B001	1234015-52-1	yes	yes	yes
RG7112	HDM2 inihibitor	SJ_AMAYASUN (synthesized in-house)	ADMJ-003-2	NA	NA	yes	yes	yes
RG7388/Idasanutlin	HDM2 inihibitor	CHEMIETEK	RG-7388	1	1229705-06-9	yes	yes	yes
RIBOCICLIB	CDK4/6 inhibitor	ABMOLE	M2218	2	1211441-98-3	yes	yes	yes
ROSCOVITINE	CDK2/9 inhibitor	LC_LABS	R-1234	NA	NA	yes	yes	yes
S63845	MCL inhibitor	CHEMIETEK	CT-S63845	1	1799633-27-4	yes	yes	yes
SCH-900776	Chk1 inhibitor	MCE	HY-15532/CS-1117	8876	891494-63-6	yes	yes	yes
SELUMETINIB	MEK inhibitor (brain penetrant)	SELLECK	S1008	S100813	606143-52-6	yes	yes	yes
SIROLIMUS	mTOR inhibitor	MEDKOO	100766	TZC50330	53123-88-9	yes	yes	yes
SONIDEGIB	Smoothened (SMO) inhibitor	ABMOLE	LDE225	1	1218778-77-8	yes	yes	yes
TALAZOPARIB	PARP inhibitor	ADOOQ	A11243	L11243B002	1207456-01-6	yes	yes	yes
TEMOZOLOMIDE	Alkylating/Methylating agent	TCI_AMERICA	T2744	MBZDG-CM	85622-93-1	yes	yes	yes
TEMSIROLIMUS	mTOR inhibitor	LC_LABS	T-8040	NA	NA	yes	yes	yes
THZ1	CDK7 inhibitor	ADOOQ	A14192	L14192B001	1604810-83-4	yes	yes	yes
TOLCAPONE	COMT inhibitor	AK_SCIENTIFIC	71884	NA	NA	yes	yes	yes
TOPOTECAN	DNA topoisomerase I inhibitor	CHEM_PACIFIC	33385	CHP0415042	119413-54-6	yes	yes	yes
TORIN 1	mTOR inhibitor	ADOOQ	A11587	L11587B003	1222998-36-8	yes	yes	yes
TRAMETINIB	MEK1/2 inhibitor	MCE	HY-10999A	4413	1187431-43-1	yes	yes	yes
TRETINON	Differentiating agent	TOCRIS	5513	1	4759-48-2	yes	yes	yes
VELIPARIB	PARP1 and PARP2 inhibitor	LC_LABS	V-4703	VLP-101	912444-00-9	yes	yes	yes
VER-155008	HSP70/90 dual inhibitor	Sigma	SML0271-5mg	113M4716V	1134156-31-2	yes	yes	yes
VINBLASTINE	Microtubule inhibitor	TOCRIS	1256	NA	NA	yes	yes	yes
VINCRISTINE	Microtubule inhibitor	TOCRIS	1257	2A/90609	2068-78-2	yes	yes	yes
VISMODEGIB	Smoothened (SMO) inhibitor	LC_LABS	V-4050	VSM-107	879085-55-9	yes	yes	yes
XAV939	Tankyrase inhibitor (beta-catenin pathway)	ABMOLE	M1796	2	284028-89-3	yes	yes	yes
